# Supplementary material for: USP53 plays an antitumor role in hepatocellular carcinoma through deubiquitination of cytochrome c
Source: PubMed Central journal article supplement (PMC9163188; doi:10.1038/s41389-022-00404-8), 2022-06-02

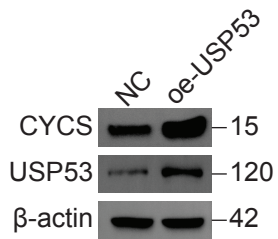

Supplement: 41389_2022_404_MOESM3_ESM.pdf [file 41389_2022_404_MOESM3_ESM.pdf]
