# Supplementary material for: USP53 plays an antitumor role in hepatocellular carcinoma through deubiquitination of cytochrome c
Source: PubMed Central journal article supplement (PMC9163188; doi:10.1038/s41389-022-00404-8), 2022-06-02

**A**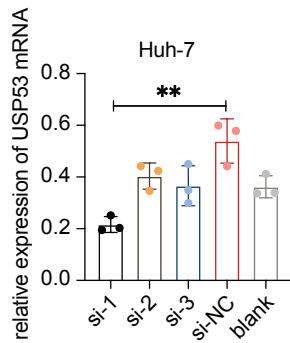**B**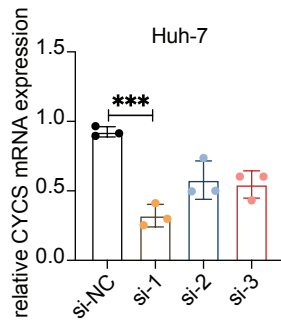

Supplement: 41389_2022_404_MOESM4_ESM.pdf [file 41389_2022_404_MOESM4_ESM.pdf]
