# Supplementary material for: USP53 plays an antitumor role in hepatocellular carcinoma through deubiquitination of cytochrome c
Source: PubMed Central journal article supplement (PMC9163188; doi:10.1038/s41389-022-00404-8), 2022-06-02
Supplement: 41389_2022_404_MOESM8_ESM.pdf [file 41389_2022_404_MOESM8_ESM.pdf]

## Changes to authorship

**Reference:** ONCSIS-21-0386RR

**Article Entitled:** USP53 plays an antitumor role in hepatocellular carcinoma through deubiquitination of cytochrome c

**Authors:** Ye Yao<sup>1,2#</sup>, Weijie Ma<sup>1,2#</sup>, Yonghua Guo<sup>1,2#</sup>, Yingyi Liu<sup>1,2</sup>, Peng Xia<sup>1,2</sup>, Xiaoling Wu<sup>1,2</sup>, Yiran Chen<sup>1,2</sup>, Kunlei Wang<sup>1,2</sup>, Chengjie Mei<sup>1,2</sup>, Ganggang Wang<sup>1,2</sup>, Xiaomian Li<sup>1,2</sup>, Zhonglin Zhang<sup>1,2</sup>, Xi Chen<sup>1,2\*</sup>, Yufeng Yuan<sup>1,2\*</sup>

1 Department of Hepatobiliary and Pancreatic Surgery, Zhongnan Hospital of Wuhan University, Wuhan 430071 Hubei, China

2 Minimally invasive treatment center of hepatobiliary and pancreatic diseases, Zhongnan Hospital of Wuhan University, Wuhan 430071, Hubei, PR China.

# Ye Yao, Weijie Ma and Yonghua Guo contributes to this study equally.

\*Correspondence Yufeng Yuan (yuanyf1971@whu.edu.cn) and Xi Chen(chenxi2022@whu.edu.cn), Department of Hepatobiliary and Pancreatic Surgery, Zhongnan Hospital of Wuhan University.

Dear editor,

Because of the author's contribution in the process of revision has changed, we need to change the current manuscript's author order and addresses, as listed above.

### Authors' contributions

Conception and design: Y.Y, X.C, and Z.Z; Development of methodology: Y.Y, Y.L and W.M; Acquisition of data: Y.Y, X.C, Y.G, C.M, X.W; Analysis of data: Y.Y, X.C, Y.C, X.L, K.W, G.W; Writing, review and revision of the manuscript: Y.Y, Y.L, W.M, X.C, Y.G. All authors read and approved the final manuscript.

After consultations, all the authors agreed with the rearrangement of the names. In the final version of the article, Xi Chen is tagged as Co-corresponding author, Weijie Ma is tagged as Co-first author.

Below are the signatures of all authors.

Ye Yao

Ye Yao

Weijie Ma

Weijie Ma

Yonghua Guo

yonghua Guo

Yingyi Liu

Yingyi Liu

Peng Xia

Peng Xia

Xiaoling Wu

Xiaoling Wu

Yiran Chen

Yiran Chen

Kunlei Wang

Wang Kunlei

Chengjie Mei

Chengjie Mei

Ganggang Wang

Ganggang Wang

Xiaomian Li

Xiaomian Li

Zhonglin Zhang

Zhonglin Zhang

Xi Chen

Xi Chen

Yufeng Yuan

Yufeng Yuan

Date: 5 April, 2022
